# 1 **Insights into the phenology of migration and survival of a long** 2 **migrant land bird**

3 **Bénédicte Madon<sup>\* a</sup>, Eric Le Nuz<sup>a</sup>, Cédric Ferlat<sup>a</sup> and Yves Hingrat<sup>a</sup>**

4 <sup>a</sup> RENECO Wildlife Preservation, Po Box 61741, Abu Dhabi, United Arab Emirates.

5 \* Corresponding author: benedicte.madon@gmail.com

## 6 7 **Lay summary:**

8 For polygamous long-migrant birds, the choice of migration strategy depends on social  
9 pressure and experience and influences the chance of survival. If you are a male, you'd better  
10 leave early in the spring to secure the best site to show off. In fall, juveniles have a hard time  
11 surviving to migration as they leave before the adults and lack experience on where to go and  
12 where to stop to rest.

## 13 14 **Short title:**

15 Differential migration and survival in a polygynous bird

## 16 17 **Abstract**

18 The process of migration stems from an adaptation of climatic seasonality and animals have  
19 developed various strategies to complete the journey between a wintering and breeding  
20 ground. Understanding the migratory behavior and determining when and where mortality  
21 occurs during the annual cycle is fundamental to understand population dynamics and  
22 implement appropriate conservation measures. Based on a big data set and advanced statistical  
23 methods, we inspected the phenology of migration of a polygynous land bird, the Macqueen's  
24 bustard, *Chlamydotis macqueenii*. We explored its migration strategies between sex, age,

25 season and geographical origin. We show that departure for migration depended on age in the  
26 fall with juveniles being the first to leave and on age and sex in the spring with juveniles  
27 departing later and males induced to arrive early in spring to secure high-quality territories.  
28 Birds breeding at higher latitudes were the first to leave in the fall and more likely to perform  
29 longer stopovers. Bustards exhibited different strategies for spring and fall migrations: spring  
30 migration was significantly longer than fall migration with more but shorter stopovers.  
31 Survival was lower for juveniles experiencing their first migration and for all birds during fall  
32 migration and on their wintering ground. Experience linked to social hierarchical pressures  
33 and environmental conditions might be the key drivers of migration strategies and survival in  
34 long-distance polygynous migrants. *Key-words:* E-SURGE, generalized linear mixed models,  
35 Macqueen's bustard, movement ecology, PELT-TREE method, satellite tracking, stopover  
36 ecology

37

38

39

40

41

42

43

44

45

46

47

48

49

50

51

52

53

54

## 55 **Introduction**

56 The annual cycle of migratory birds stems from an adaptation to climatic seasonality and is  
57 typically composed by three major events of variable timing, duration and sequencing:  
58 breeding, molt and the return journey between wintering and breeding grounds, i.e., the  
59 migration (Somveille et al. 2015). Different sets of rules determining the process of migration  
60 (Alerstam et al. 2006, Duriez et al. 2009), called migration strategy, have been highlighted  
61 and three main hypotheses were proposed (for a review see Ketterson and Nolan 1983) to  
62 explain the differences in migration strategy between individual classes (e.g., age, sex,  
63 reproductive status). The ‘Arrival Time’ hypothesis invokes that the reproductive fitness of  
64 one sex is partly influenced by the acquisition of a territory in early spring, and, as high  
65 quality territories are limited, the early arrival of individuals is an advantage to secure a  
66 territory acquisition (Kokko 1999). The ‘dominance’ hypothesis (or ‘competitive release’  
67 hypothesis) posits that food scarcity drives subordinate individuals to migrate further to limit  
68 food competition (Rogers et al. 1989). The ‘body size’ hypothesis (or ‘thermal tolerance’  
69 hypothesis) suggests that thermal efficiency dictates migratory tendency, with smaller  
70 individuals being more likely to migrate further. These hypotheses stem from the study of bird  
71 migration which has been largely dominated by studies on bird species benefitting from  
72 intensive ringing programs (Bairlein 2001). However, for species with no other movement  
73 monitoring options (limited field access: ocean and desert crossing species), the development  
74 of remote monitoring tools such as satellite tracking brought a much needed salvation and has  
75 opened new perspectives (Arizaga et al. 2014). This is the case of the Macqueen’s bustard,

76 *Chlamydotis macqueenii*, a partial migrant bird species (Goriup 1997), classified as  
77 Vulnerable (BirdLife International 2014). From the early 90's, an intensive monitoring of  
78 migrant individuals using satellite tracking was launched by the National Avian Research  
79 Centre (Abu Dhabi, United Arab Emirates) and laid the foundations for the early study of the  
80 species. Migrant populations were shown to breed from west Kazakhstan to China and winter  
81 in the range of resident populations in South Central Asia and the Middle-East (Combreau et  
82 al. 2001, Combreau et al. 2011b). On their breeding ground, migrant Macqueen's bustard  
83 exhibit a polygynous mating system where males compete for display territories to which they  
84 remain faithful during the breeding season (Riou and Combreau 2014). This monitoring effort  
85 has been reinforced to this day, with more than 400 birds equipped with satellite transmitters  
86 in central Asia. This unprecedented data set offers the opportunity to better highlight the  
87 migration strategies among sex and age-classes in a rarely-studied system, i.e. a polygynous  
88 land bird (but see Kessler et al. 2013, Garcia De La Morena 2015), in the light of the three  
89 main hypotheses: arrival-time, dominance and body-size. Site fidelity and intra-sexual  
90 competition are likely to be the main drivers for male migration timing and distance  
91 (Schroeder and Robb 2003; Boyle 2008), suggesting the 'arrival time' hypothesis. Females  
92 and juveniles, whose fitness depend less on securing a breeding site and whose survival might  
93 be influenced by their smaller size (Martín et al. 2007), might have an obligate strategy due to  
94 social hierarchical pressures of male dominance, suggesting the 'dominance' and 'body size'  
95 hypotheses.

96 The chosen migration strategy will likely influence the annual survival of individuals, which  
97 is the product of survival rates at the four periods of their annual cycle: breeding, fall  
98 migration, wintering, and spring migration. Tracking data sets can be converted in capture-  
99 recapture histories allowing advanced survival analyses (Duriez et al. 2009, Hardouin et al.  
100 2014) taking into account such temporal breakdown. However, the extent of differential

101 migratory patterns and their relation to differential survival rates has rarely been explored  
102 (Hutto 2000, Sillett and Holmes 2002, Lok 2011). Yet understanding the migratory behavior  
103 and determining when and where mortality occurs during the annual cycle is fundamental to  
104 understand population dynamics and implement appropriate conservation measures (Leyrer et  
105 al. 2013, Klaassen et al. 2014).

106 Based on an eight-year satellite-tracking data set, we inspected the full picture of migration  
107 and survival of the Macqueen's Bustard. Using recent advances in movement analyses, we  
108 were first able to determine individual movement key timings. Then, using robust statistical  
109 analyses and multistate capture-recapture modelling, we highlighted the influence of  
110 individual traits (age and sex) and spatio-temporal factors (geographic origin and season) on  
111 the migration strategy and survival of a polygynous long-migrant land bird species.

112

## 113 **Materials and methods**

### 114 DATA

115 A total of 414 wild migrant Macqueen's Bustards were captured during the breeding season  
116 (end of March to end of June) between 2010 and 2013 in Uzbekistan (Navoi district, 39°N,  
117 65°E) and between 2005 and 2013 in Kazakhstan (Central Kazakhstan: Shimkent area, 43°N,  
118 67°E; East Kazakhstan: 46°N, 78°E; West Kazakhstan: Mangystau area, 42.75°N, 52°E;  
119 Fig.1). Adult birds were trapped using loop cord snares. Males were trapped on their display  
120 sites baited by a dummy female and females were trapped on their nest replacing live eggs  
121 with wooden eggs (see method in Hardouin et al. 2014). Juveniles were trapped by hand  
122 before fledging (see method in Combreau et al. 2002 and Hardouin et al. 2011). All birds  
123 were weighted and ringed. Males weighted on average 2 kg  $\pm$ 1.7, females 1.3 kg  $\pm$ 1.3 and  
124 juveniles 0.7 kg  $\pm$ 1.3. Birds were equipped GPS-PTT (platform terminal transmitter) solar-  
125 powered satellite transmitters (Microwave Telemetry Inc, Columbia, MD, USA) of 22 to 45g

126 depending on bird weight (representing on average  $3\% \pm 1$  of individuals weight (Kenward  
127 2001). Transmitters were operated through the ARGOS system in Toulouse (CLS, France)  
128 and programmed to record a GPS position every two hours and transmit once every two days.

129 Satellite tracking data from birds that did not migrate before the transmitter stopped  
130 transmitting or with missing data (See Madon and Hingrat 2014) were not included in the  
131 analysis. Hence a total of 158 wild adults and 41 wild juveniles were included in the analyses  
132 (Table 1). Data were first filtered by precision: GPS and ARGOS locations of CLS classes 2  
133 and 3 were selected. The last daily location was then retained for each individual to allow for  
134 regular time spacing (i.e., an approximate 24h gap) between successive locations. Location  
135 coordinates were then projected using the Asia north equidistant conic projection in ArcGIS  
136 10.1 (ESRI 2012) to calculate distances between successive locations (in km), i.e., daily  
137 distances, and build a daily distance time series for each bird.

138 The PELT-TREE method was used to break down the daily distance time series of each bird.  
139 This recent framework combines a change point algorithm to find the changes in variance, the  
140 so called change points, in the daily distance series for each bird and a classification tree to  
141 classify the obtained segments. Here we considered three movement behavioral classes:  
142 staging, migratory and non-migratory movements. Based on the training data used by the  
143 classification tree, the mathematical rules to classify the segments into the three movement  
144 classes were defined as follow: segments with mean  $< 17.642$  km were classified as “staging”,  
145 segments with mean  $> 17.642$  km and  $< 100.284$  km as “non-migratory” and segments with  
146 mean  $> 100.284$  km as “migratory” (See Madon and Hingrat 2014 for details).

147 Based on the segmentation, we defined, for each bird, key timings of migration as follow:  
148 departure date, i.e., start of migration, as the first day of migratory movement (or non-  
149 migratory movement if immediately followed by a migratory movement) following a staging  
150 period, in the opposite direction compared to the preceding migratory movement; arrival date,

151 i.e., end of migration, as the first day of staging after a migratory movement (or non-  
152 migratory movement if immediately following a migratory movement), given that the next  
153 migratory movement is in the opposite direction; and stopover as any segment of staging  
154 behavior between the departure and arrival dates.

## 155 STATISTICAL MODELLING

### 156 Migration strategy

157 We explored the fall and spring migration strategy of the Macqueen's bustard in terms of six  
158 response variables: 1- fall and spring migration departure dates, 2- migration distances, i.e.,  
159 sum of the daily distances (in km) between the migration departure and arrival dates, 3-  
160 migration duration, i.e., number of days between the departure and arrival dates, 4- number of  
161 stopovers, i.e., number of staging segments between the migration departure and arrival dates.

162 The variable migration duration was further broken down into two variables in the analyses:  
163 5- duration of migratory movement, i.e., total length in days of migratory and non-migratory  
164 movement segments between the migration departure and arrival dates, 6- duration of  
165 stopovers (Alerstam et al. 2006), i.e., total length in days of staging segments between the  
166 migration departure and arrival dates.

167 We conducted two sets of linear (or generalized linear) mixed model (See (Bolker et al. 2008)  
168 for a review) analyses on each response variable with individual and year as random factors  
169 (Table 2) using four data sets: dataset 1- all individuals, dataset 2- sexed individuals, i.e.,  
170 adults only, dataset 3- all individuals presenting at least 1 stopover, and dataset 4- sexed  
171 individuals (adults only) presenting at least one stopover (Table 2).

172 With datasets 1 and 3, we used explanatory fixed factors "Age" (available for all individuals),  
173 "Place" (corresponding to the breeding place for the adults and birth place for the juveniles),

174 “Season” (except for response variables fall and spring departure dates) to model the response  
175 variables. Because Macqueen’s bustards may start breeding from one year old (Saint Jalme  
176 and van Heezik 1996), only the first year of monitoring of juveniles was included in the  
177 analyses to account for them as non-breeders. So factor “Age” refers to the reproductive status  
178 of individuals. With datasets 2 and 4, we used factor “Sex”, along with factors “Place” and  
179 “Season” (except for response variables fall and spring departure dates)(Table 2). Only the  
180 interaction Sex\*Season was considered, due to small sample sizes in levels of other  
181 interactions and factors were considered significant when  $p < 0.05$  or  $|t| > 2$  ( $p$  being  
182 unavailable in package ‘lmm’) (Baayen et al. 2008, Bolker et al. 2008). All analyses were  
183 conducted in R (R Core Team 2014).

#### 184 Survival

185 We used multistate capture-recapture models to estimate survival by describing the transition  
186 between the states “alive” and “dead” (Lebreton et al. 1992). These models are defined in  
187 terms of three processes (initial state, event and state processes) allowing the simultaneous  
188 estimation of: the encounter probability (the probability that an individual is encountered in  
189 site  $A$  and time  $t$  given that it is alive in site  $A$  and time  $t$ ), the apparent survival (the  
190 probability that an individual alive at site  $A$  and time  $t$  is still alive at time  $t+1$ ) and transition  
191 between sites, i.e., movements (the probability that an individual moves from site  $S$  at time  $t$   
192 to site  $Z$  at time  $t+1$ , given that it survived from time  $t$  to  $t+1$ ; hence denoted “transition  
193 matrix” or “movement probabilities” conditional on survival) (Lebreton and Pradel 2002).  
194 Here we dealt with a mixture of live recaptures and dead recoveries (e.g., Duriez et al. 2009,  
195 Le Gouar et al. 2011), reported when the transmitters were retrieved in the field. Hence  
196 survival was modelled as a transition from the state “alive” to the state “newly dead”.  
197 Encounter histories were split in four yearly occasions, each corresponding to one “movement  
198 phase” with two fates, i.e., alive recaptures and dead recoveries. The four occasions



199 corresponded to the four seasonal phases of movement of a migratory animal determined by  
200 the above key timings: on the breeding ground (period between the spring arrival date and fall  
201 departure date), in fall migration (period between the fall departure date and the fall arrival  
202 date), on the wintering ground (period between the fall arrival date and the spring departure  
203 date) and in spring migration (period between the spring departure date and the spring arrival  
204 date). We thus accounted for nine states: four alive states (1-4) and four newly dead states (5-  
205 8) in the seasonal phases of movement and one unobserved dead state (9). Given that  
206 individuals were equipped with GPS-PTT transmitter, the successive states occupied by an  
207 individual can be observed directly and the encounter probability in the four alive states is  
208 consequently equal to 1. In the transition matrix, movement and survival are considered as  
209 two successive steps. Here, if a bird was found dead during a movement phase, it had  
210 necessarily moved from the previous movement phase before dying. Therefore, movements  
211 were estimated before survival in the transition matrix, i.e., the survival probability depends  
212 on the site of arrival, e.g., in Duriez et al. (2009).

213 Difficulties in attributing precisely the “movement phase” arose when a bird died after  
214 starting migration, as it was not possible to determine whether it was still migrating or had  
215 arrived on the wintering/breeding site before dying. Thus, we considered that an individual  
216 was newly dead on the breeding ground: 1- when transmitters were retrieved on the breeding  
217 ground or 2- when the individual was lost after the 1<sup>st</sup> of July (i.e., the signal was suddenly  
218 lost or it was reported non-moving with the same position before loss of the signal but the  
219 transmitter was not retrieved in the field). Similarly we considered that an individual was  
220 newly dead on the wintering ground: 1- when PTT transmitters were retrieved on the  
221 wintering ground or 2- when the individual was lost after the 1<sup>st</sup> of January.

222 Each step of a multistate model, i.e., initial state, event process and state process, can be  
223 parametrized with environmental covariates or individual factors. Here we focused on

224 individual factors “Experience”, “Sex\*Age” (males, females and juveniles), “Place” (Central  
225 Kazakhstan, East Kazakhstan, West Kazakhstan and Uzbekistan) and time factors. Factor  
226 “Experience” was related to age at capture and consisted in two groups: “first timers” and  
227 “experienced birds”. The group “first timers” included the first year of monitoring of birds  
228 equipped as juveniles on the breeding ground, hence first timers in terms of fall migration,  
229 wintering and following spring migration. The group of “experienced birds” corresponds to  
230 birds equipped as adults and to juveniles after a first year of monitoring (from their second  
231 spring after their first fall migration). Time factor included “4 periods”: time divided in the  
232 four movement phases. We also tested time divided into “2 periods” with time periods pulled  
233 into 2 main periods “spring migration and breeding ground” and “fall migration and wintering  
234 ground”, to account for the difficulties in attributing death to these successive periods.  
235 Model selection was performed using program E-SURGE v1.8.9 (Choquet et al. 2009) with  
236 an Akaike Information Criterion corrected for sample size calculated as follows:  $QAICc =$   
237  $(\text{deviance}/\hat{c}) + 2K + (2K(K+1))/(n-K-1)$ , where  $K$  and  $n$  are the number of parameters and the  
238 effective sample size respectively. The preferred model was the one with the smaller QAICc  
239 value and two models were deemed to be equivalent when they differed by less than two. In  
240 addition to the QAICc, we paid attention also to the biological plausibility and quality  
241 (confidence intervals) of the estimates when selecting models. We used a generalized logit-  
242 link function. Description of the model structure and matrix patterns used in the models  
243 developed in E-SURGE is given in Appendix S1.

244

## 245 **Results**

246 Among Macqueen’s bustards equipped in Central Asia with GPS-PTT transmitter between  
247 2005 and 2013, we obtained accurate data for our analysis from 201 birds (Table 1). Birds

248 were followed on average over two migrations ( $se = 0.07$ ), i.e one year. Two females from  
249 West Kazakhstan were followed during 10 and 14 migrations, i.e., five and seven years.

250

## 251 MIGRATION JOURNEY CHARACTERISTICS

252

### 253 Sex-based differential migration

254 Among adults, there was no difference in the timing of departure between males and females  
255 in the fall but in the spring, males departed for migration 8 ( $se = 2.98$ ,  $lqmm\ p = 0.01$ ) days  
256 earlier (Table 1). Migration distance was similar and both sexes were as likely to perform  
257 stopovers. Migration duration, which included stopovers and movements, was significantly  
258 shorter for males (glmm (logit scale)  $\beta = -0.24$  ( $se = 0.1$ ),  $p = 0.02$ ) (Table 3). There was no  
259 difference in terms of duration of movement but the time spent on stopovers by males was  
260 significantly shorter (glmm (log scale)  $\beta = -0.3$  ( $se = 0.12$ ),  $p = 0.01$ ).

261

### 262 Age-based differential migration

263 Juveniles departed for migration significantly earlier than adults in fall (6 days,  $se = 2.79$ ,  
264  $lqmm\ p = 0.03$ ) and later in spring (27 days,  $se = 3.37$ ,  $lqmm\ p < 0.05$ ) (Table 1). On average,  
265 juveniles travelled as long as adults for both migrations in terms of distance and migration  
266 duration and were as likely to perform stopovers. However, time spent on stopover was  
267 significantly longer (glmm (log scale)  $\beta = 0.36$  ( $se = 0.17$ ),  $p = 0.03$ ) (Table 3).

268

### 269 Geographical origin-based differential migration

270 Birds departing from East Kazakhstan, migrated more than twice as far as birds from lower  
271 latitudes (i.e., on average 2958 ( $se = 35.84$ ) km for East Kazakhstan against 1228 ( $se = 84.65$ )  
272 km for Uzbekistan) (Fig. 1, Table 3). As a consequence the median dates of departure

273 followed a latitudinal gradient for both the fall and spring migrations: birds from breeding  
274 grounds at lower latitudes left later for migration. For the fall migration, the median date  
275 departure of birds from higher latitudes departed significantly earlier. Compared to birds from  
276 Central Kazakhstan, birds from East Kazakhstan departed 37 ( $se = 3.44.21$ ,  $lqmm\ p < 0.05$ )  
277 days earlier and birds from West Kazakhstan 9 ( $se = 2.43.55$ ,  $lqmm\ p < 0.05$ ) days earlier.  
278 Birds from Central Kazakhstan departed slightly earlier (4 days) than birds from Uzbekistan  
279 (Table 1). In the spring, the departure dates did not follow the latitudinal gradient. Adult birds  
280 from Central Kazakhstan were the last ones to depart for migration on 8 March (67<sup>th</sup> day,  $se =$   
281 1.43): West Kazakhstan birds departed 6 days earlier ( $se = 2$ ,  $lqmm\ p < 0.05$ ), Uzbekistan  
282 birds 7 days earlier ( $se = 2.9$ ,  $lqmm\ p = 0.02$ ), and East Kazakhstan birds 14 days earlier ( $se =$   
283 4.25,  $lqmm\ p < 0.05$ ).

284 Birds with longer migratory journeys were more likely to perform stop-overs (Table 3). For  
285 example, birds from East Kazakhstan which travelled on average 1328 km ( $se = 92.05$ ,  $lmm\ t$   
286 = 14.43) more than birds from Central Kazakhstan, were 10 times more likely to perform  
287 stopovers (glmm (logit scale)  $\beta = 2.3$  ( $se = 0.53$ ),  $p < 0.05$ ), 90% of their migration legs  
288 displayed at least one stopover and they spent significantly longer periods at stopover sites (on  
289 average 28.68 ( $se = 2.44$ ) days, glmm (log scale)  $\beta = 0.63$  ( $se = 0.15$ ),  $p < 0.05$ ). On the other  
290 hand, birds from Uzbekistan were less likely to stop for refueling (glmm (logit scale)  $\beta = -$   
291 1.66 ( $se = 0.75$ ),  $p = 0.03$ ) and only 28% of their migration legs included a stopover (Table 3).

292

### 293 Season-based differential migration

294 Macqueen's bustards appeared to exhibit different behaviors in spring and fall migrations.  
295 Results indicated that spring migration was significantly longer than fall migration  
296 (respectively 24.52 ( $se = 1.03$ ) days against 20.66 ( $se = 1.24$ ) days, glmm (log scale)  $\beta = 0.24$   
297 ( $se = 0.023$ ),  $p < 0.05$ ) (Table 3). However, spring migration was significantly shorter in terms

298 of movement duration for males (interaction sex\*season, glmm (log scale)  $\beta = -0.17$  ( $se =$   
299  $0.07$ ),  $p = 0.015$ ). In terms of refueling strategy, birds were more likely to stop during the  
300 spring migration (glmm (logit scale)  $\beta = 1.8$  ( $se = 0.26$ ),  $p < 0.05$ ) and performed more  
301 stopovers in the spring (glmm (log scale)  $\beta = 0.66$  ( $se = 0.099$ ),  $p < 0.05$ ). However, time  
302 spent on stopovers was longer during fall migration (glmm (log scale)  $\beta = -0.07$  ( $se = 0.04$ ),  $p$   
303  $= 0.058$ ).

## 304 SURVIVAL

306 The best fitting model for survival was the model including the interaction of “experience”  
307 and the factor “4 periods” where time was divided in the four movement phases (Table 4).  
308 First-timers, i.e. juveniles during their first year, had a lower probability to survive at each  
309 time period. These differences in survival were especially apparent during their first fall  
310 migration ( $0.62$   $se = 0.07$  compared to experienced birds:  $0.87$   $se = 0.019$ ) and wintering  
311 period ( $0.65$   $se = 0.086$  compared to experienced birds:  $0.89$   $se = 0.019$ ). There were no sex-  
312 biased mortality patterns (Table 5). Finally, the different migration strategies in fall and spring  
313 appeared to impact survival with significantly higher probabilities of surviving the spring  
314 migration for both first-timers and experienced birds (respectively  $0.9$   $se = 0.067$  and  $0.97$   $se$   
315  $= 0.01$ ). Survival probabilities were also higher on the breeding ground for experienced birds  
316 than on wintering grounds (respectively  $0.96$   $se = 0.009$  and  $0.88$   $se = 0.01$ ).

317

## 318 Discussion

### 319 Timing of migration and survival

320 The co-existence of different migratory strategies between age and sex groups has been  
321 largely discussed and linked to constraints and selective forces in relation to reproductive

322 success, survival and competition. In polygynous species, male competition for display  
323 territories during the breeding season is likely to be the main driver for male migration timing  
324 (Schroeder and Robb 2003). Our results support the ‘arrival time’ hypothesis: in order to  
325 optimize their fitness, Macqueen’s bustard males are induced to arrive early in spring to  
326 acquire high-quality territories. Such fitness benefit probably out-weights the cost of  
327 migrating out the optimal temporal window, e.g., challenging conditions encountered during  
328 late winter-early spring migration (Kokko 1999). Females, on the other hand, can arrive later  
329 in spring without reducing their fitness (Kokko et al. 2006). This intersexual out of sync  
330 migration timing, e.g., protandry in the spring (Schmaljohann et al. 2015), also warrants  
331 females lesser intersexual competition for resources at stopover sites. Interestingly, these  
332 differential migration timings do not lead to differences in survival between sexes although  
333 for most bird species survival is thought to be higher for males (Sillert and Holmes 2002).

334 Different factors, such as experience and body condition, are likely to influence migration  
335 strategy and survival probability. The body size hypothesis assumes that smaller individuals  
336 are less likely to withstand cold temperatures and to experience greater risks associated with  
337 fasting in winter (Boyle 2008). This is corroborated by our results showing that, in fall,  
338 juveniles leave breeding grounds earlier than adults. Juveniles might be constrained to leave  
339 the breeding ground when food and environmental conditions deteriorate because of  
340 competition, reduced foraging ability and site-familiarity (Bai and Schmidt 2012). They may  
341 be physiologically less capable of undertaking full migration, e.g., different molt process  
342 reducing juveniles flying abilities (Newton 2011) or of selecting optimal flight altitude  
343 (Mateos-Rodríguez and Liechti 2012). In the Macqueen’s bustard, juveniles which depart  
344 earlier do not benefit from social cues to initiate their first fall migration and they cannot use  
345 social learning by following adults to locate suitable stopovers and wintering sites and  
346 minimize predation risk (Nocera and Ratcliffe 2010, Cresswell 2014). As a consequence,

347 juveniles spent more time on stopovers and had lower survival probabilities during migration  
348 as well as on wintering grounds. Greater first-year stochasticity in route-finding, suggesting a  
349 bet-hedging strategy (Reilly and Reilly 2009), should nonetheless provide populations of  
350 Macqueen's bustards with greater resilience abilities to large-scale changes (Cresswell 2014).  
351 In the following spring, juveniles, which are probably less driven by a breeding pressure,  
352 departed later than adults. Little is known about juvenile reproduction timing in Macqueen's  
353 bustards. Studies on North African Houbara bustards, *Chlamydotis undulata undulata*,  
354 showed that females initiated reproduction at 1.6 (standard deviation = 0.5) and males at 2.1  
355 (standard deviation = 0.8) years-old (Hardouin et al. 2014). If the pattern of age at first  
356 reproduction is similar in the Macqueen's bustard, it is likely that juvenile migration  
357 phenology will be highly variable for the first 2 years (Combreau et al. 2011) and likely more  
358 related to natal dispersal (Hardouin et al. 2012). By differing their departure from wintering  
359 ground, they might also be able to optimize their survival, hence the high observed survival in  
360 the spring migration, by reducing food competition with adults but also by benefiting from the  
361 experience acquired in their first migration leg in fall and on wintering ground (Cresswell  
362 2014).

363

### 364 **Refueling and survival**

365 With the development of bird tracking, it has been shown that many species use stopovers  
366 along their annual migratory cycle (Guilford et al. 2009, Chevallier et al. 2011, Åkesson et al.  
367 2012). Under the concept of optimal migration, rules for refueling decision at stopover sites  
368 have been developed to determine the number of stopovers and time spent on stopovers in  
369 order to optimize migration in a given set of constraints (Weber et al. 1999, Duriez et al. 2009,  
370 Alerstam 2011). Surprisingly, very few studies have highlighted differential stopover  
371 strategies between age, sex, season and geographical origin (Ellegren 1991, Dierschke et al.

2005, Alerstam et al. 2006) and our results demonstrated an effect of each of these factors. As expected, juveniles, that were inexperienced for their first migration, used longer stopovers, a result of different factors detailed above. Our results also highlighted a difference between males and females in terms of time spent on stopovers, with significantly shorter refueling periods for males. This suggests that males use a riskier strategy in spring with faster travel and shorter refueling times in order to optimize their arrival time (Åkesson et al. 2012) or that males have a higher refueling rate (Seewagen et al. 2013). However, these different strategies do not lead to differential survival between sexes. Seasonal differences in migration stopover patterns are also apparent, with individuals performing less but longer stopovers in the fall (Kokko 1999, Alerstam 2006). The longer stopover duration during the fall migration, also observed in some raptor species (Klaassen et al. 2014), might suggest that individuals molt during their fall stopovers and therefore that the role of fall stopovers is twofold: refueling and molting (Hutto 2000). In the case of the Macqueen's bustard, molting occurs in summer (between end of breeding and migration departure, Gubin 2008) and should not impact the species stopover strategy. Central Asian steppes are characterized by a high productivity during spring which rapidly decreases after summer (Eisfelder et al. 2014). On-route environmental conditions (food limitation and cold temperatures) might be the main drivers for longer stopovers in the fall (Alerstam 2006). In addition, bird condition might be affected by a potential "carry-over effect" of the breeding season (display investments for the males and the parental cares that drain energy reserves for the females). This could explain the observed greater mortality during the fall migration and wintering period, which could be exacerbated by uncontrolled hunting and poaching pressures (Combreau et al. 2001, Combreau 2007). On the other hand, the spring strategy involving short flights interspersed with fewer stopovers to load small fuel reserves assumes that birds will stop at all suitable sites along the migration route making migrants dependent on a chain of sites and



397 consequently more vulnerable to environmental changes in the spring. Under the principle of  
398 “multiple jeopardy”, i.e., the probability that any one site is affected by environmental change  
399 increases with the number of sites (Newton 2004), birds from higher latitudes (East and West  
400 Kazakhstan) which cover greater migratory distances and rely on multiple stopovers (Navedo  
401 et al. 2010), will be under greater threat from environmental changes and will be consequently  
402 more likely to show declines.

403

## 404 **Conclusion**

405 Little is known about the phenology of migration in polygynous land migrant bird species.  
406 Our study provides the first direct evidence of complex migration behaviors and survival:  
407 seasonal survival and migration strategies varying by sex, age, season and geographic origin  
408 linked to social, hierarchical and physiological pressures. Since direct observations are not  
409 possible yet on most parts of the migratory path and wintering ground, we have to rely solely  
410 on remote tools and we demonstrate that technology coupled with robust statistical analyses  
411 clearly shed light on migration strategies, a key element to implement appropriate  
412 conservation measures. Mortality of both adults and juveniles occurs predominantly during  
413 the fall migration and the wintering period, similarly to the migrating red knot *Calidris*  
414 *canutus canutus* (Leyrer et al. 2013) and seems to be the driver of decline in many migratory  
415 birds (Rappole and McDonald 1994, Carrete et al. 2013). Understanding the relative  
416 importance of factors leading to the low survival rates observed during the fall migration and  
417 winter (habitat quality versus anthropogenic threats) in relation to migration strategies and  
418 stopover choices between populations or individuals will be essential to help improve the  
419 current conservation and translocation efforts (see [www.houbarafund.org](http://www.houbarafund.org)).

420

421

422

423

424 **References**

425 Åkesson S, Klaassen R, Holmgren J, Fox JW, Hedenström A. 2012. Migration Routes and  
426 Strategies in a Highly Aerial Migrant, the Common Swift *Apus apus*, Revealed by Light-  
427 Level Geolocators. PLoS ONE 7.

428

429 Alerstam, T. 2011. Optimal bird migration revisited. J. Ornithol. 152: 5-23.

430

431 Alerstam T, Hake M, Kjellén N. 2006. Temporal and spatial patterns of repeated migratory  
432 journeys by ospreys. Anim. Behav. 71: 555-566.

433

434 Arizaga J, Crespo A, Telletxea I, Ibáñez R, Díez F, Tobar J, Minondo M, Ibarrola Z, Fuente J,  
435 Pérez J. 2015. Solar/Argos PTTs contradict ring-recovery analyses: Woodcocks wintering in  
436 Spain are found to breed further east than previously stated. J. Ornithol. 156: 515-523.

437

438 Baayen RH, Davidson DJ, Bates DM. 2008. Mixed-effects modeling with crossed random  
439 effects for subjects and items. J. Mem. Lang. 59: 390-412.

440

441 Bai M-L, Schmidt D. 2012. Differential migration by age and sex in central European  
442 Ospreys *Pandion haliaetus*. J. Ornithol. 153: 75-84.

443

444 Bairlein F. 2001. Results of bird ringing in the study of migration routes. Ardea 89: 7–19.

445

446 BirdLife International 2014. *Chlamydotis macqueenii*. The IUCN Red List of Threatened  
447 Species. Version 2015.2.

448

449 Bolker BM, Brooks ME, Clark CJ, Geange SW, Poulsen JR, Stevens MHH, White J-SS.  
450 2008. Generalized linear mixed models: a practical guide for ecology and evolution. *Trends*  
451 *Ecol. Evol.* 24: 127-135.

452

453 Boyle WA 2008. Partial migration in birds: tests of three hypotheses in a tropical lekking  
454 frugivore. *J. Anim. Ecol.* 77: 1122-1128.

455

456 Carrete M, Bortolotti GR, Sánchez-Zapata JA, Delgado A, Cortés-Avizanda A, Grande JM,  
457 Donázar JA. 2013. Stressful conditions experienced by endangered Egyptian vultures on  
458 African wintering areas. *Anim. Conserv.* 16: 353-358.

459

460 Chevallier D, Maho Y, Brossault P, Baillon F, Massemin S. 2011. The use of stopover sites  
461 by Black Storks (*Ciconia nigra*) migrating between West Europe and West Africa as revealed  
462 by satellite telemetry. *J. Ornithol.* 152: 1-13.

463

464 Choquet R. 2008. Automatic generation of multistate capture-recapture models. *Can. J. Stat.*  
465 36: 43-57.

466

467 Choquet R, Rouan L, Pradel R. 2009. Program E-SURGE: a software application for fitting  
468 Multievent models Series: Environmental and Ecological Statistics , Vol. 3 Thomson, David  
469 L.; Cooch, Evan G.; Conroy, Michael J. (Eds.) p 845-865.

470

471 Combreau O, Launay F, Lawrence M. 2001. An assessment of annual mortality rates in  
472 adult-sized migrant houbara bustards (*Chlamydotis [undulata] macqueenii*). Anim. Conserv.  
473 4: 133-141.

474

475 Combreau O. 2007. Arabic falconery and the illegal Houbara trade in Arabia. Falco 16-17.

476

477 Combreau O, Riou S, Judas J, Lawrence M, Launay F. 2011a. Population structure, migratory  
478 connectivity and inference on gene exchange mechanisms in the Asian Houbara Bustard  
479 *Chlamydotis macqueenii*: a summary of recent findings. Biodiversity Conservation in the  
480 Arabian Peninsula: Zoology in the Middle East (ed. H. Kasperek Verlag).

481

482 Combreau O, Riou S, Judas J, Lawrence M, Launay F. 2011b. Migratory Pathways and  
483 Connectivity in Asian Houbara Bustards: Evidence from 15 Years of Satellite Tracking. PLoS  
484 ONE 6.

485

486 Cresswell W. 2014. Migratory connectivity of Palaearctic–African migratory birds and their  
487 responses to environmental change: the serial residency hypothesis. Ibis 156: 493-510.

488

489 Dierschke V, Mendel B, Schmaljohann H. 2005. Differential Timing of Spring Migration in  
490 Northern Wheatears *Oenanthe oenanthe*: Hurried Males or Weak Females? Behav. Ecol.  
491 Sociobiol. 57: 470-480.

492

493 Duriez O. 2009. Estimating survival and movements using both live and dead recoveries: a  
494 case study of oystercatchers confronted with habitat change. J. Appl. Ecol. 46: 144-153.

495

496 Duriez O, Bauer S, Destin A, Madsen J, Nolet BA, Stillman RA, Klaassen M. 2009. What  
497 decision rules might pink-footed geese use to depart on migration? An individual-based  
498 model. *Behav. Ecol.* 20: 560-569.  
499

500 Ellegren H. 1991. Stopover Ecology of Autumn Migrating Bluethroats *Luscinia s. svecica* in  
501 Relation to Age and Sex. *Ornis Scand.* 22: 340-348.  
502

503 Eisfelder C. 2014. Net primary productivity in Kazakhstan, its spatio-temporal patterns and  
504 relation to meteorological variables. *J Arid Environ.* 103: 17-30.  
505

506 Gubin B. 2008. A Natural History of the Houbara Bustard. Environment Agency-Abu Dhabi  
507 and Motivate Publishing 2008. Pp 306.  
508

509 Guilford T, Meade J, Willis J, Phillips RA, Boyle D, Roberts S, Collett M, Freeman R, Perrins  
510 CM. 2009. Migration and stopover in a small pelagic seabird, the Manx shearwater *Puffinus*  
511 *puffinus*: insights from machine learning. *P. Roy. Soc. Lond. B Bio.*  
512

513 Hardouin LA, Nevoux M, Robert A, Gimenez O, Lacroix F, Hingrat Y. 2012. Determinants  
514 and costs of natal dispersal in a lekking species. *Oikos* 121: 804-812.  
515

516 Hardouin LA, Robert A, Nevoux M, Gimenez O, Lacroix F, Hingrat Y. 2014. Meteorological  
517 conditions influence short-term survival and dispersal in a reinforced bird population. *J. Appl.*  
518 *Ecol.* 51(6): 1494-1503.  
519

520 Hutto RL. 2000. On the importance of en route periods to the conservation of migratory  
521 landbirds. *Stud. Avian Biol.* 20: 109-114.

522

523 Kessler AE, Batbayar N, Natsagdorj T, Batsuur D, Smith AT. 2013. Satellite telemetry  
524 reveals long-distance migration in the Asian great bustard *Otis tarda dybowskii*. *J. Avian Biol.*  
525 44: 311-320.

526

527 Ketterson ED, Nolan V Jr. 1983. Geographic Variation and Its Climatic Correlates in the Sex  
528 Ratio of Eastern-Wintering Dark-Eyed Juncos (*Junco Hyemalis Hyemalis*). *Ecol.* 57: 679-693.

529

530 Klaassen RHG, Hake M, Strandberg R, Koks BJ, Trierweiler C, Exo K-M, Bairlein F,  
531 Alerstam T. 2014. When and where does mortality occur in migratory birds? Direct evidence  
532 from long-term satellite tracking of raptors. *J. Anim. Ecol.* 83: 176-184.

533

534 Kokko H. 1999. Competition for early arrival in migratory birds. *J. Anim. Ecol.* 68: 940-950.

535

536 Kokko H, Gunnarsson TG, Morrell LJ, Gill JA. 2006. Why do female migratory birds arrive  
537 later than males? *J. Anim. Ecol.* 75: 1293-1303.

538

539 Le Gouar P, Schekkerman H, van der Jeugd H, Boele A, van Harxen R, Fuchs P, Stroeken P,  
540 van Noordwijk A. 2011. Long-term trends in survival of a declining population: the case of  
541 the little owl (*Athene noctua*) in the Netherlands. *Oecologia* 166: 369-379.

542

- 543 Lebreton J-D, Burnham KP, Clobert J, Anderson DR.1992. Modeling Survival and Testing  
544 Biological Hypotheses Using Marked Animals: A Unified Approach with Case Studies. Ecol.  
545 Monogr. 62: 67-118.  
546
- 547 Lebreton J-D, Pradel R. 2002. Multistate recapture models: Modelling incomplete individual  
548 histories. J. Appl. Stat. 29: 353-369.  
549
- 550 Leyrer J, Lok T, Brugge M, Spaans B, Sandercock B, Piersma T. 2013. Mortality within the  
551 annual cycle: seasonal survival patterns in Afro-Siberian Red Knots *Calidris canutus canutus*.  
552 J. Ornithol. 154: 933-943.  
553
- 554 Lok T, Overdijk O, Tinbergen JM, Piersma T. 2011. The paradox of spoonbill migration:  
555 most birds travel to where survival rates are lowest. Anim. Behav. 82: 837-844.  
556
- 557 Madon B, Hingrat Y. 2014. Deciphering behavioral changes in animal movement with a  
558 ‘multiple change point algorithm- classification tree’ framework. Frontiers Ecol. Evol. 2.  
559
- 560 Martín C, Alonso J, Alonso J, Palacín C, Magaña M, Martín B. 2007. Sex-biased juvenile  
561 survival in a bird with extreme size dimorphism, the great bustard *Otis tarda*. J. Avian Biol.  
562 38: 335-346.  
563
- 564 Mateos-Rodríguez M, Liechti F. 2012. How do diurnal long-distance migrants select flight  
565 altitude in relation to wind? Behav. Ecol. 23: 403-409.  
566

567 Navedo J, Orizaola G, Masero J, Overdijk O, Sánchez-Guzmán J. 2010. Long-distance  
568 travellers stopover for longer: a case study with spoonbills staying in North Iberia. *J. Ornithol.*  
569 151: 915-921.

570

571 Newton I. 2004. Population limitation in migrants. *Ibis* 146: 197-226.

572

573 Newton I. 2011. Migration within the annual cycle: species, sex and age differences. *J.*  
574 *Ornithol.* 152: 169-185.

575

576 Nocera JJ, Ratcliffe LM. 2010. Migrant and resident birds adjust antipredator behavior in  
577 response to social information accuracy. *Behav. Ecol.* 21: 121-128.

578

579 R Core Team (2014). R: A language and environment for statistical computing. R Foundation  
580 for Statistical Computing, Vienna, Austria. URL <http://www.R-project.org/>.

581

582 Rappole JH, McDonald MV. 1994. Cause and Effect in Population Declines of Migratory  
583 Birds. *The Auk* 111: 652-660.

584

585 Reilly JR, Reilly RJ. 2009. Bet-hedging and the orientation of juvenile passerines in fall  
586 migration. *J. Anim. Ecol.* 78: 990-1001.

587

588 Rogers CM, Theimer TL, Nolan Jr V, Ketterson ED. 1989. Does dominance determine how  
589 far dark-eyed juncos, *Junco hyemalis*, migrate into their winter range? *Anim. Behav.* 37 (3):  
590 498-506.

591



592 Saint Jalme M, van Heezik Y. 1996. (eds). Propagation of the Houbara Bustard. – Kegan Paul  
593 International/ NCWCD, London.  
594  
595 Schmaljohann H, Meier C, Arlt D, Bairlein F, van Oosten H, Morbey YE, Åkesson S,  
596 Buchmann M, Chernetsov N, Desaeveer R, Elliott J, Hellström M, Liechti F, López A,  
597 Middleton J, Ottosson U, Pärt T, Spina F, Eikenaar C. 2015. Proximate causes of avian  
598 protandry differ between subspecies with contrasting migration challenges. *Behav. Ecol.*  
599  
600 Schroeder MA, Robb LA. 2003. Fidelity of greater sage-grouse *Centrocercus urophasianus* to  
601 breeding areas in a fragmented landscape. *Wildlife Biol.* 9: 291-299.  
602  
603 Seewagen CL, Guglielmo CG, Morbey YE. 2013. Stopover refueling rate underlies protandry  
604 and seasonal variation in migration timing of songbirds. *Behav. Ecol.* 24: 634-642.  
605  
606 Sillett TS, Holmes RT. 2002. Variation in survivorship of a migratory songbird throughout its  
607 annual cycle. *J. Anim. Ecol.* 71: 296-308.  
608  
609 Somveille M, Rodrigues ASL, Manica A. 2015. Why do birds migrate? A macroecological  
610 perspective. *Global Ecol. Biogeogr.* 24(6): 664-674.  
611  
612 Weber TP. 1999. Should I stay or should I go? Testing optimality models of stopover  
613 decisions in migrating birds. *Behav. Ecol. Sociobiol.* 46: 280-286.  
614  
615  
616  
617

618

619

620

621

622 Table 1- Sample sizes by sex and geographical areas between 2005 and 2013 of PTT-equipped equipped  
 623 individuals, subset of individuals included in the analyses with their monitoring lengths (and associated standard  
 624 error) in terms of complete migration numbers, and timing of fall and spring migration as median departure dates  
 625 (day of the year) with associated standard error.  
 626

| Country    | Region  | Sex      | Number in               |                 |                      |                   |                     |              |
|------------|---------|----------|-------------------------|-----------------|----------------------|-------------------|---------------------|--------------|
|            |         |          | Individuals<br>equipped | the<br>analyses | Monitoring<br>length | Mean fall<br>date | Mean spring<br>date |              |
| Kazakhstan | West    | female   | 43                      | 37              | 3.1 (0.5)            | 14 oct (2.5)      | 6 mar (1.4)         |              |
|            |         | male     | 19                      | 19              | 2.5 (0.5)            | 19 oct (4)        | 26 feb (2.1)        |              |
|            |         | Juvenile | 23                      | 19              | 1.5 (0.4)            | 30 sept (2.7)     | 24 mar (2.1)        |              |
|            | Central | female   | 213                     | 47              | 3.3 (0.4)            | 18 oct (1.6)      | 11 mar (1.5)        |              |
|            |         | male     | 30                      | 11              | 2.4 (0.4)            | 7 nov (3.6)       | 2 mar (2.7)         |              |
|            |         | Juvenile | 34                      | 26              | 0.6 (0.2)            | 18 oct (2.8)      | 1 ap (7.2)          |              |
|            |         | East     | female                  | 20              | 18                   | 2.8 (0.5)         | 10 sept (2.6)       | 23 feb (3.5) |
|            |         |          | male                    | 9               | 9                    | 2.8 (0.8)         | 22 sept (4.9)       | 18 feb (3.2) |
|            |         |          | Juvenile                | 8               | 6                    | 0.3 (0.3)         | 12 sept (4.6)       | 12 ap (na)   |
| Uzbekistan | Navoi   | female   | 13                      | 6               | 2.5 (0.6)            | 17 oct (5.2)      | 4 mar (3.7)         |              |
|            |         | Male     | 4                       | 3               | 1.3 (1.3)            | 8 nov (3.4)       | 24 feb (16.5)       |              |

Table 2- Modeling approaches (model type: lqmm = linear quantile mixed model on median; lmm = linear mixed model glmm = generalized linear mixed model; data distribution: “Family” (with the link for the glmm); R package and function) for the following migration response variables: fall and spring departure date, migration distance, duration of movement, number and duration of stopovers, using 4 datasets (“1” = all individuals, “2”= sexed individuals, i.e., adults only, “3” = all individuals presenting at least 1 stopover, “4” = sexed individuals presenting at least 1 stopover) and factor “Age”, “Place”(i.e., breeding place), “Sex” (adult birds) and “Season” as explanatory fixed factors and individual and year as random factors.

| Response \ Explanatory | Age                 | Place | Sex  | Season | Model type | Family (link) | R Package: function |
|------------------------|---------------------|-------|------|--------|------------|---------------|---------------------|
|                        | Fall departure date | 1     | 1, 2 | 2      |            | lqmm          | Normal              |
| Spring departure date  |                     |       |      |        |            |               |                     |
| Migration distance     | 1                   | 1,2   | 2    | 1,2    | lmm        | Normal        | lme4: lmer()        |
| Migration duration     | 1                   | 1,2   | 2    | 1,2    | glmm       | Poisson (log) | lme4: glmer()       |
| Duration of movement   | 1                   | 1,2   | 2    | 1,2    | glmm       | Poisson (log) | lme4: glmer()       |

|                       |   |     |   |     |      |                                 |               |
|-----------------------|---|-----|---|-----|------|---------------------------------|---------------|
| Number of stopovers   | 1 | 1,2 | 2 | 1,2 | glmm | Binomial (logit)/               | lme4: glmer() |
|                       | 3 | 3,4 | 4 | 3,4 |      | Poisson (log),<br>Poisson (log) |               |
| Duration of stopovers | 3 | 3,4 | 4 | 3,4 | glmm | Poisson (log)                   | lme4: glmer() |

---

Table 3- Mean (*and standard error*) of migratory distances (in km), migration duration (in days), duration of movement (in days) and proportion (%) of migratory legs with at least one stopover and among those, mean (*and standard error*) total duration (in days) and number of stopovers for the fall and spring migrations of wild Macqueen's bustards breeding in Asia (in Uzbekistan (Uzbek) and Kazakhstan: Betpakdalah (Betpak), Eastbalkash (Eatbal), Fetisovo (Fetis)), and equipped with PTT transmitter between 2005 and 2013.

| Individual                  |          |          |         | Breeding place |         |         |         | Season  |        |
|-----------------------------|----------|----------|---------|----------------|---------|---------|---------|---------|--------|
| Age                         |          | Sex      |         | Betpak         | Eastbal | Fetis   | Uzbek   | Fall    | Spring |
| adult                       | juvenile | A.female | A.male  |                |         |         |         |         |        |
| <i>Migration distance</i>   |          |          |         |                |         |         |         |         |        |
| 1894                        | 1465     | 1901     | 1873    | 1684           | 2958    | 1678    | 1228    | 1866    | 1875   |
| (29.21)                     | (129.81) | (32.43)  | (66.23) | (34.28)        | (35.84) | (26.82) | (89.49) | (39.69) | (42)   |
| <i>Migration duration</i>   |          |          |         |                |         |         |         |         |        |
| 22.77                       | 18.26    | 23.65    | 19.82   | 19.84          | 39.75   | 19.51   | 9.11    | 20.61   | 24.58  |
| (0.83)                      | (2.95)   | (0.98)   | (1.48)  | (1.15)         | (0.94)  | (0.94)  | (1.46)  | (1.22)  | (1.02) |
| <i>Duration of movement</i> |          |          |         |                |         |         |         |         |        |
| 10.72                       | 10.18    | 10.89    | 10.17   | 9.9            | 13.97   | 10.56   | 6.72    | 10.8    | 10.58  |
| (0.26)                      | (1.02)   | (0.31)   | (1.42)  | (0.36)         | (0.74)  | (0.38)  | (0.77)  | (0.36)  | (0.35) |

---

*Proportion of migratory legs including at least one stopover*

|    |       |       |       |      |       |       |       |       |       |
|----|-------|-------|-------|------|-------|-------|-------|-------|-------|
| 63 | 40.74 | 64.15 | 59.43 | 58.2 | 89.87 | 57.29 | 27.78 | 46.85 | 77.97 |
|----|-------|-------|-------|------|-------|-------|-------|-------|-------|

---

*Number of stopovers performed among migration legs with at least one stopover*

|        |       |        |        |        |        |        |        |        |        |
|--------|-------|--------|--------|--------|--------|--------|--------|--------|--------|
| 1.5    | 1.55  | 1.51   | 1.46   | 1.45   | 1.8    | 1.36   | 1.2    | 1.38   | 1.58   |
| (0.03) | (0.1) | (0.03) | (0.06) | (0.04) | (0.09) | (0.04) | (0.11) | (0.03) | (0.04) |

---

*Total duration of stopovers performed among migration legs with at least one stopover*

|        |        |        |        |       |       |        |        |        |        |
|--------|--------|--------|--------|-------|-------|--------|--------|--------|--------|
| 19.1   | 19.82  | 19.87  | 16.24  | 17.08 | 28.68 | 15.62  | 8.6    | 20.95  | 17.95  |
| (0.73) | (2.52) | (0.85) | (1.42) | (1)   | (2.3) | (0.77) | (0.89) | (1.25) | (0.78) |

---

Table 4- Best models for Macqueen's bustard survival selected with E-SURGE with associated number of identifiable parameters (# Id Par.), deviance, QAIC and QAICc.

---

| <b>Model</b> | <b>Parametrization of survival</b> | <b># Id Par.</b> | <b>Deviance</b> | <b>QAIC</b> | <b>QAICc</b> |
|--------------|------------------------------------|------------------|-----------------|-------------|--------------|
| <b>1</b>     | <b>experience*2 periods</b>        | 6                | 920.6           | 932.6       | 932.6        |
| <b>2</b>     | <b>experience*4 periods</b>        | 10               | 916.2           | 936.2       | 936.3        |
| <b>3</b>     | <b>sex*age*2 periods</b>           | 8                | 928.6           | 944.6       | 944.8        |
| <b>4</b>     | <b>sex*4 periods</b>               | 14               | 922.9           | 950.9       | 951.2        |
| <b>5</b>     | <b>experience*place*4 periods</b>  | 29               | 896.7           | 954.7       | 956          |

---



Table 5- Estimates of survival with associated standard errors (se) and CIs (lower bound: “CI-“, upper bound: “CI+”) for Macqueen’s bustard with the 3 best models selected (Table 4) by E-SURGE. Note that the survival for first-timers is 1 (model 2) for the breeding ground as they have necessarily survived to be included and do not have a following breeding period as they are followed only the first year.

| Model | Covariate 1 | Covariate 2         | Estimate | CI-  | CI+  | se    |
|-------|-------------|---------------------|----------|------|------|-------|
| 1     | experienced | Spring mig/breeding | 0.96     | 0.94 | 0.97 | 0.009 |
|       | experienced | Fall mig/wintering  | 0.88     | 0.85 | 0.9  | 0.01  |
|       | First-timer | Spring mig/breeding | 0.95     | 0.81 | 0.99 | 0.04  |
|       | First timer | Fall mig/wintering  | 0.63     | 0.52 | 0.7  | 0.05  |
| 2     | experienced | breeding            | 0.95     | 0.92 | 0.97 | 0.014 |
|       | experienced | Fall mig            | 0.87     | 0.83 | 0.91 | 0.019 |
|       | experienced | wintering           | 0.89     | 0.84 | 0.92 | 0.019 |
|       | experienced | Spring mig          | 0.97     | 0.94 | 0.99 | 0.01  |
|       | First-timer | breeding            | 1        | 1    | 1    | 0     |
|       | First-timer | Fall mig            | 0.62     | 0.48 | 0.74 | 0.069 |
|       | First-timer | wintering           | 0.65     | 0.47 | 0.79 | 0.086 |
|       | First-timer | Spring mig          | 0.9      | 0.68 | 0.97 | 0.067 |
| 3     | Male        | Spring mig/breeding | 0.97     | 0.92 | 0.99 | 0.015 |
|       | Male        | Fall mig/wintering  | 0.87     | 0.8  | 0.91 | 0.029 |

|        |                     |      |      |      |       |
|--------|---------------------|------|------|------|-------|
| Female | Spring mig/breeding | 0.95 | 0.93 | 0.97 | 0.015 |
| female | Fall mig/wintering  | 0.88 | 0.85 | 0.91 | 0.015 |
| Undet  | Spring mig/breeding | 0.97 | 0.89 | 0.99 | 0.021 |
| Undet  | Fall mig/wintering  | 0.71 | 0.61 | 0.78 | 0.051 |

---

Fig. 1- Places of origin (trapping locations) of Macqueen's bustards equipped in Uzbekistan and in Kazakhstan (East, Central and West Kazakhstan) between 2005 and 2013. Black dots are daily locations of 150 wild adults and 51 wild juveniles retained for analyses.

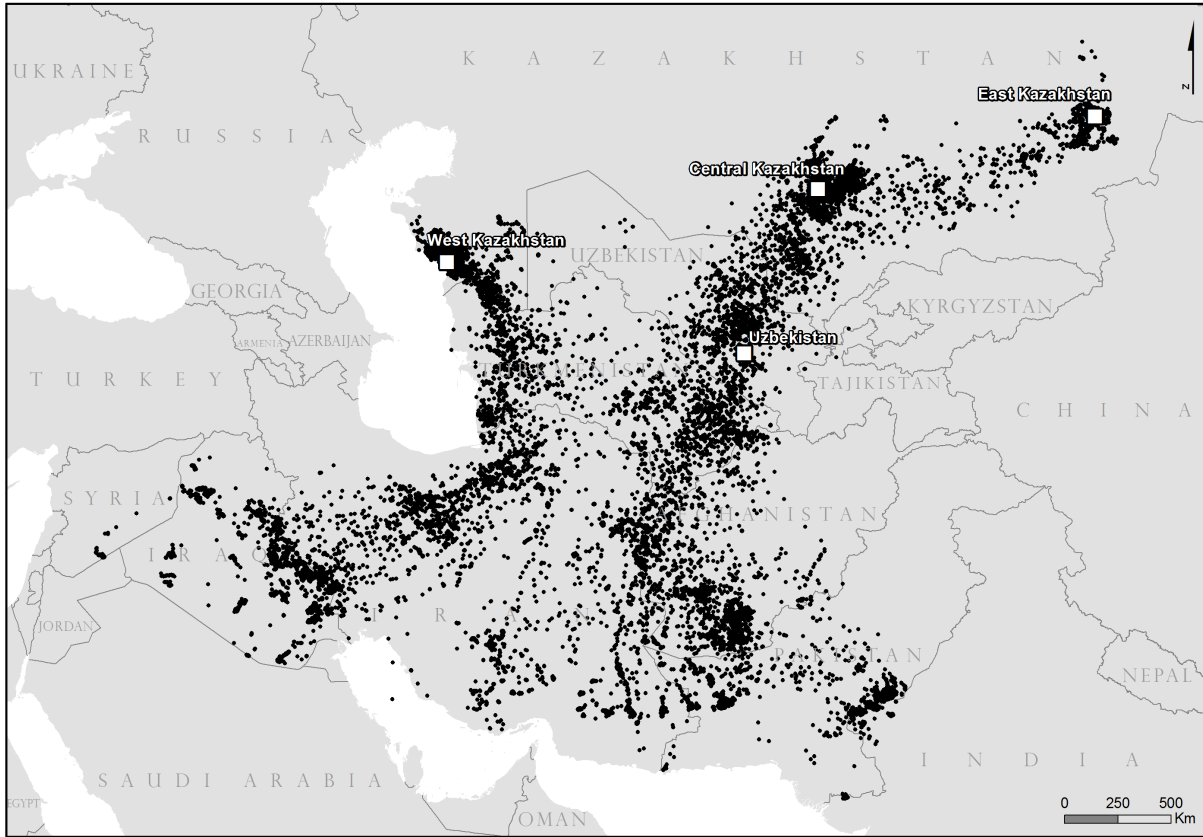

Source: http://biorxiv.org/content/10.1101/028597v1.full.pdf
